# Supplementary material for: Influenza vaccine effectiveness against laboratory-confirmed influenza in hospitalised adults aged 60 years or older, Valencia Region, Spain, 2017/18 influenza season
Source: PubMed Central journal article supplement (PMC6685101; doi:10.2807/1560-7917.es.2019.24.31.1800461), 2019-08-01
Supplement: 1800461_DIEZ-DOMINGO_influenza_Supplement.pdf [file 1800461_DIEZ-DOMINGO_influenza_Supplement.pdf]

| Isolate ID | Type       | Segment | Collection date | Isolate Name                 | Originating Laboratory                                                  | Submitting Laboratory                                            | Authors                          |
|------------|------------|---------|-----------------|------------------------------|-------------------------------------------------------------------------|------------------------------------------------------------------|----------------------------------|
| EPI294991  | B Yamagata | HA      | 2017-11-29      | B/Hong Kong/930/2017         | Government Virus Unit                                                   | Crick Worldwide Influenza Centre                                 | Gregory, Vicki                   |
| EPI295009  | B Yamagata | HA      | 2017-12-12      | B/Slovenia/2654/2017         | Laboratory for Virology, National Institute of Public Health            | Crick Worldwide Influenza Centre                                 | Gregory, Vicki                   |
| EPI295013  | B Yamagata | HA      | 2017-12-04      | B/Spain/107178/2017          | Universidad de Valladolid                                               | Crick Worldwide Influenza Centre                                 | Gregory, Vicki                   |
| EPI295014  | B Yamagata | HA      | 2017-12-07      | B/Spain/108127/2017          | Universidad de Valladolid                                               | Crick Worldwide Influenza Centre                                 | Gregory, Vicki                   |
| EPI296170  | B Yamagata | HA      | 2017-11-15      | B/Buenos Aires/11926546/2017 | Instituto Nacional de Enfermedades Infecciosas                          | Crick Worldwide Influenza Centre                                 | Ermetal, Burcu                   |
| EPI296184  | B Yamagata | HA      | 2017-12-29      | B/Portugal/SUI144/2017       | Instituto Nacional de Saude (INSA)                                      | Crick Worldwide Influenza Centre                                 | Ermetal, Burcu                   |
| EPI296187  | B Yamagata | HA      | 2017-12-28      | B/Slovenia/2786/2017         | Laboratory for Virology, National Institute of Public Health            | Crick Worldwide Influenza Centre                                 | Ermetal, Burcu                   |
| EPI296190  | B Yamagata | HA      | 2017-11-13      | B/Valladolid/183/2017        | Universidad de Valladolid                                               | Crick Worldwide Influenza Centre                                 | Ermetal, Burcu                   |
| EPI296373  | B Yamagata | HA      | 2017-11-06      | B/Alberta/RV2559/2017        | National Microbiology Laboratory Health Canada                          | Centers for Disease Control and Prevention                       | DaSilva, Juliana                 |
| EPI297023  | B Yamagata | HA      | 2018-01-02      | B/Yunnan-Wenshan/11/2018     | WHO Chinese National Influenza Center                                   | WHO Chinese National Influenza Center                            | Zeng, Xiaoxu                     |
| EPI297024  | B Yamagata | HA      | 2017-11-21      | B/Hubei-Zhangwan/36/2017     | WHO Chinese National Influenza Center                                   | WHO Chinese National Influenza Center                            | Zeng, Xiaoxu                     |
| EPI299705  | B Yamagata | HA      | 2017-05-26      | B/Laos/F1664/2017            | National Institute of Infectious Diseases (NIID)                        | WHO Collaborating Centre for Reference and Research on Influenza | Komadina, Naomi                  |
| EPI30253   | B Yamagata | HA      | 2004            | B/Malaysia/2506/2004         |                                                                         | Other Database Import                                            | Initial Import ...               |
| EPI303188  | B Yamagata | HA      | 2017-12-04      | B/Hubei-Jiangnan/1974/2017   | WHO Chinese National Influenza Center                                   | Centers for Disease Control and Prevention                       | DaSilva, Juliana                 |
| EPI70224   | B Yamagata | HA      | 2009-10-11      | B/Hong Kong/514/2009         | Government Virus Unit                                                   | National Institute for Medical Research                          | Gregory, Vicki                   |
| EPI99942   | B Yamagata | HA      | 2011-03-07      | B/Malta/MV636714/2011        | Mater Dei Hospital                                                      | National Institute for Medical Research                          | Gregory, Vicki                   |
| EPI293829  | B Victoria | HA      | 2017-11-06      | B/Perth/62/2017              | Pathwest QE II Medical Centre                                           | WHO Collaborating Centre for Reference and Research on Influenza | Komadina, Naomi                  |
| EPI132268  | B Victoria | HA      | 2012-08-03      | B/Iohannesburg/3964/2012     | Sandringham National Institute for Communicable Diseases                | National Institute for Medical Research                          | Gregory, Vicki                   |
| EPI208671  | B Victoria | HA      | 2016-01-04      | B/Nordrhein-Westfalen/1/2016 | Robert Koch Institute Nationales Referenzzentrum Pflanzliche Pathologie | Crick Worldwide Influenza Centre                                 | Gregory, Vicki                   |
| EPI208680  | B Victoria | HA      | 2015-01-14      | B/Ireland/3154/2015          | National Virus Reference Laboratory                                     | Crick Worldwide Influenza Centre                                 | Gregory, Vicki                   |
| EPI219327  | B Victoria | HA      | 2012-11-28      | B/South Australia/81/2012    | Institute of Medical and Veterinary Science (IMVS)                      | WHO Collaborating Centre for Reference and Research on Influenza | Komadina, Naomi                  |
| EPI246494  | B Victoria | HA      | 2008-08-04      | B/Brisbane/60/2008           | WHO Centre for Reference & Research on Influenza                        | Crick Worldwide Influenza Centre                                 | Ermetal, Burcu                   |
| EPI246895  | B Victoria | HA      | 2012-08-06      | B/Formosa/V2367/2012         | Instituto Nacional de Enfermedades Infecciosas                          | Crick Worldwide Influenza Centre                                 | Ermetal, Burcu                   |
| EPI273908  | B Victoria | HA      | 2017-04-19      | B/Moscow/114/2017            | Ivanovsky Research Institute of Virology RAMS                           | Crick Worldwide Influenza Centre                                 | Gregory, Vicki                   |
| EPI273915  | B Victoria | HA      | 2017-04-10      | B/Novosibirsk/75/2017        | WHO National Influenza Centre Russian Federation                        | Crick Worldwide Influenza Centre                                 | Gregory, Vicki                   |
| EPI282641  | B Victoria | HA      | 2016-12-27      | B/Maryland/15/2016           | Centers for Disease Control and Prevention                              | WHO Collaborating Centre for Reference and Research on Influenza | Komadina, Naomi                  |
| EPI287082  | B Victoria | HA      | 2017-02-07      | B/Niger/4582/2017            | Centre de Recherche Medicale et Sanitaire (CERMES)                      | Crick Worldwide Influenza Centre                                 | Gregory, Vicki                   |
| EPI287092  | B Victoria | HA      | 2017-02-08      | B/Niger/4661/2017            | Centre de Recherche Medicale et Sanitaire (CERMES)                      | Crick Worldwide Influenza Centre                                 | Gregory, Vicki                   |
| EPI287093  | B Victoria | HA      | 2017-02-24      | B/Niger/4674/2017            | Centre de Recherche Medicale et Sanitaire (CERMES)                      | Crick Worldwide Influenza Centre                                 | Gregory, Vicki                   |
| EPI289184  | B Victoria | HA      | 2017-11-08      | B/Rancagua/90587/2017        | Instituto de Salud Publica de Chile                                     | Instituto de Salud Publica de Chile                              | Fernandez, Jorge Osvaldo         |
| EPI291286  | B Victoria | HA      | 2017            | B/Norway/2409/2017           | Crick Worldwide Influenza Centre                                        | WHO Collaborating Centre for Reference and Research on Influenza | Komadina, Naomi                  |
| EPI291527  | B Victoria | HA      | 2017-11-27      | B/Centre/1582/2017           | Institut Pasteur                                                        | Crick Worldwide Influenza Centre                                 | Gregory, Vicki                   |
| EPI291528  | B Victoria | HA      | 2017-06-07      | B/Norway/2957/2017           | WHO National Influenza Centre                                           | Crick Worldwide Influenza Centre                                 | Gregory, Vicki                   |
| EPI291551  | B Victoria | HA      | 2017-09-12      | B/Clermont-Ferrand/1894/2017 | CNR Influenza France Sud                                                | Crick Worldwide Influenza Centre                                 | Gregory, Vicki                   |
| EPI291583  | B Victoria | HA      | 2017-11-08      | B/Mexico/2735/2017           | Laboratorio de Virus Respiratorio                                       | Centers for Disease Control and Prevention                       | DaSilva, Juliana                 |
| EPI291615  | B Victoria | HA      | 2017-12-24      | B/California/88/2017         | California Department of Health Services                                | Centers for Disease Control and Prevention                       | DaSilva, Juliana                 |
| EPI292757  | B Victoria | HA      | 2017-03-24      | B/Wate/34/2017               | National Institute of Infectious Diseases (NIID)                        | Centers for Disease Control and Prevention                       | DaSilva, Juliana                 |
| EPI293828  | B Victoria | HA      | 2017-10-20      | B/Darwin/108/2017            | Royal Darwin Hospital                                                   | WHO Collaborating Centre for Reference and Research on Influenza | Komadina, Naomi                  |
| EPI294967  | B Victoria | HA      | 2017-12-04      | B/CastillaLaMancha/2439/2017 | Instituto de Salud Carlos III                                           | Crick Worldwide Influenza Centre                                 | Gregory, Vicki                   |
| EPI294970  | B Victoria | HA      | 2017-11-17      | B/Galicia/2407/2017          | Instituto de Salud Carlos III                                           | Crick Worldwide Influenza Centre                                 | Gregory, Vicki                   |
| EPI294971  | B Victoria | HA      | 2017-12-02      | B/Galicia/2465/2017          | Instituto de Salud Carlos III                                           | Crick Worldwide Influenza Centre                                 | Gregory, Vicki                   |
| EPI294980  | B Victoria | HA      | 2017-12-19      | B/Hong Kong/1095/2017        | Government Virus Unit                                                   | Crick Worldwide Influenza Centre                                 | Gregory, Vicki                   |
| EPI294985  | B Victoria | HA      | 2017-12-17      | B/Hong Kong/1111/2017        | Government Virus Unit                                                   | Crick Worldwide Influenza Centre                                 | Gregory, Vicki                   |
| EPI294986  | B Victoria | HA      | 2017-12-17      | B/Hong Kong/1118/2017        | Government Virus Unit                                                   | Crick Worldwide Influenza Centre                                 | Gregory, Vicki                   |
| EPI294991  | B Victoria | HA      | 2017-11-29      | B/Hong Kong/930/2017         | Government Virus Unit                                                   | Crick Worldwide Influenza Centre                                 | Gregory, Vicki                   |
| EPI295009  | B Victoria | HA      | 2017-12-12      | B/Slovenia/2654/2017         | Laboratory for Virology National Institute of Public Health             | Crick Worldwide Influenza Centre                                 | Gregory, Vicki                   |
| EPI295013  | B Victoria | HA      | 2017-12-04      | B/Spain/107178/2017          | Universidad de Valladolid                                               | Crick Worldwide Influenza Centre                                 | Gregory, Vicki                   |
| EPI295014  | B Victoria | HA      | 2017-12-07      | B/Spain/108127/2017          | Universidad de Valladolid                                               | Crick Worldwide Influenza Centre                                 | Gregory, Vicki                   |
| EPI296170  | B Victoria | HA      | 2017-11-15      | B/Buenos Aires/11926546/2017 | Instituto Nacional de Enfermedades Infecciosas                          | Crick Worldwide Influenza Centre                                 | Ermetal, Burcu                   |
| EPI296184  | B Victoria | HA      | 2017-12-29      | B/Portugal/SUI144/2017       | Instituto Nacional de Saude (INSA)                                      | Crick Worldwide Influenza Centre                                 | Ermetal, Burcu                   |
| EPI296187  | B Victoria | HA      | 2017-12-28      | B/Slovenia/2786/2017         | Laboratory for Virology                                                 | National Institute of Public Health                              | Crick Worldwide Influenza Centre |
| EPI296190  | B Victoria | HA      | 2017-11-13      | B/Valladolid/183/2017        | Universidad de Valladolid                                               | Crick Worldwide Influenza Centre                                 | Ermetal, Burcu                   |
| EPI296373  | B Victoria | HA      | 2017-11-06      | B/Alberta/RV2559/2017        | National Microbiology Laboratory Health Canada                          | Centers for Disease Control and Prevention                       | DaSilva, Juliana                 |
| EPI297023  | B Victoria | HA      | 2018-01-02      | B/Yunnan-Wenshan/11/2018     | WHO Chinese National Influenza Center                                   | WHO Chinese National Influenza Center                            | Zeng, Xiaoxu                     |
| EPI297024  | B Victoria | HA      | 2017-11-21      | B/Hubei-Zhangwan/36/2017     | WHO Chinese National Influenza Center                                   | WHO Chinese National Influenza Center                            | Zeng, Xiaoxu                     |
| EPI299705  | B Victoria | HA      | 2017-05-26      | B/Laos/F1664/2017            | National Institute of Infectious Diseases (NIID)                        | WHO Collaborating Centre for Reference and Research on Influenza | Komadina, Naomi                  |
| EPI30253   | B Victoria | HA      | 2004            | B/Malaysia/2506/2004         |                                                                         | Other Database Import                                            | Initial Import ...               |
| EPI303188  | B Victoria | HA      | 2017-12-04      | B/Hubei-Jiangnan/1974/2017   | WHO Chinese National Influenza Center                                   | Centers for Disease Control and Prevention                       | DaSilva, Juliana                 |
| EPI70224   | B Victoria | HA      | 2009-10-11      | B/Hong Kong/514/2009         | Government Virus Unit                                                   | National Institute for Medical Research                          | Gregory, Vicki                   |
| EPI99942   | B Victoria | HA      | 2011-03-07      | B/Malta/MV636714/2011        | Mater Dei Hospital                                                      | National Institute for Medical Research                          | Gregory, Vicki                   |

[1] Shu, Y., McCauley, J. (2017) GISAID: Global initiative on sharing all influenza data – from vision to reality  
 EuroSurveillance, 22(13) doi:10.2807/1560-7917.ES.2017.22.13.30494 PMCID: PMC5388101
